# Supplementary material for: GB1275, a first-in-class CD11b modulator: rationale for immunotherapeutic combinations in solid tumors
Source: PubMed Central journal article supplement — J Immunother Cancer. 2021 Aug 26;9(8):e003005. doi: 10.1136/jitc-2021-003005 (PMC8404448; doi:10.1136/jitc-2021-003005), 2021-08-26
Supplement: jitc-2021-003005supp001.pdf [file jitc-2021-003005supp001.pdf]

# GB1275, a first-in-class CD11b modulator: rationale for immunotherapeutic combinations in solid tumors

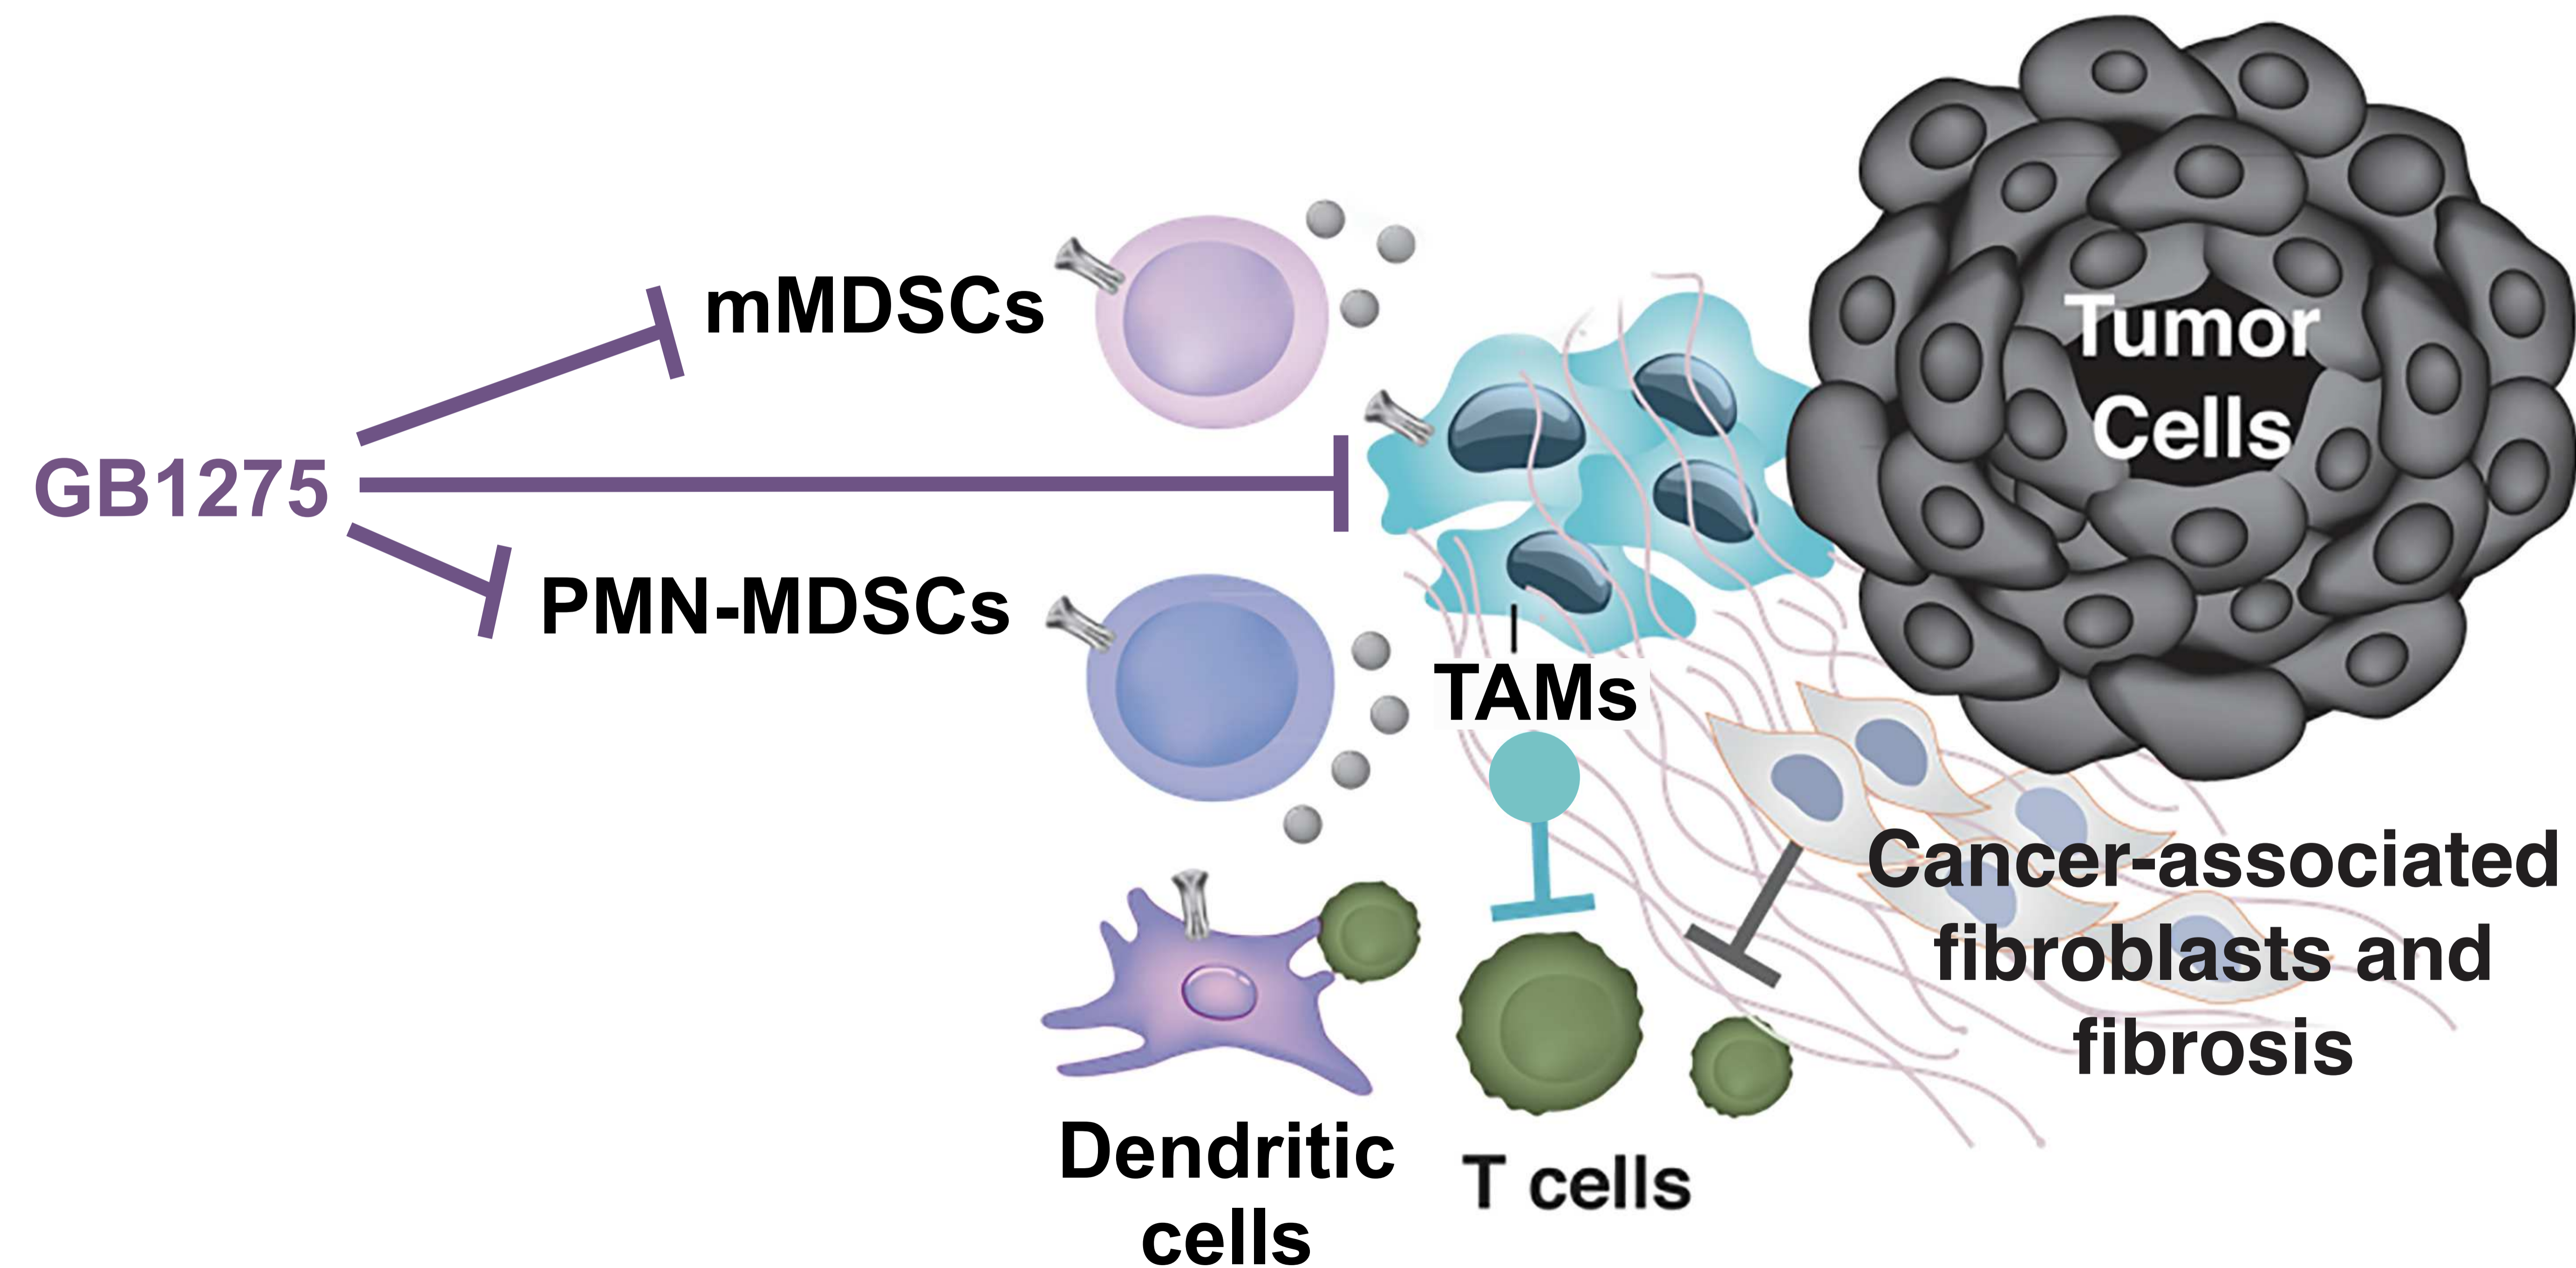

## Authors

David G. DeNardo, Anna Galkin, Jakob Dupont, Lei Zhou, Johanna C. Bendell

## Correspondence

ddenardo@wustl.edu

## In Brief

GB1275 binds CD11b on tumor-associated macrophages (TAMs) and monocytic- and polymorphonuclear-myeloid-derived suppressor cells (mMDSCs and PMN-MDSCs) leading to a shift in polarization to pro-inflammatory phenotypes and an influx of activated CD8+ T cells. GB1275 induced alterations in the tumor immune infiltrate led to improved response to standard of care and checkpoint blockade in preclinical models and may provide an approach to target MDSC-mediated resistance to immune checkpoint inhibitors in advanced solid tumors.
